# Supplementary material for: IFN-γ immune priming of macrophages in vivo induces prolonged STAT1 binding and protection against Cryptococcus neoformans
Source: PubMed Central journal article supplement (PMC6197699; doi:10.1371/journal.ppat.1007358), 2018-10-10

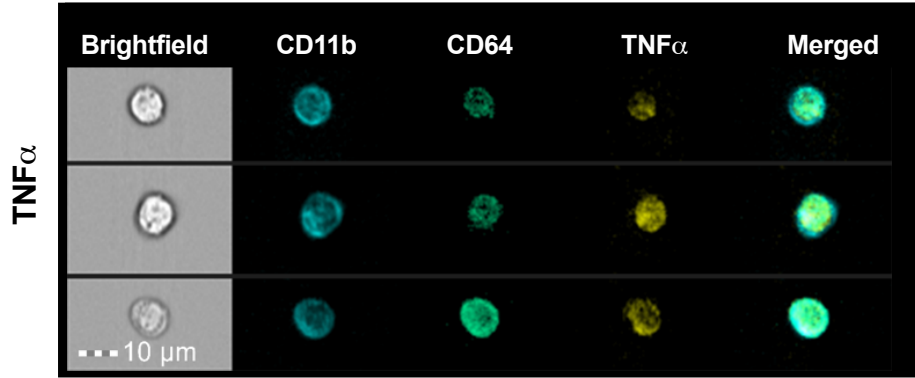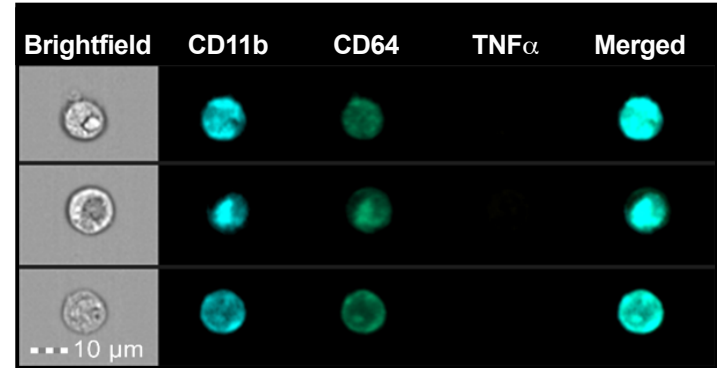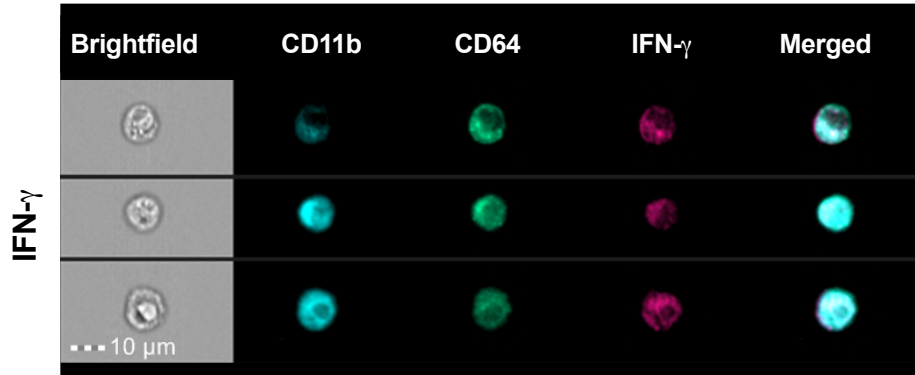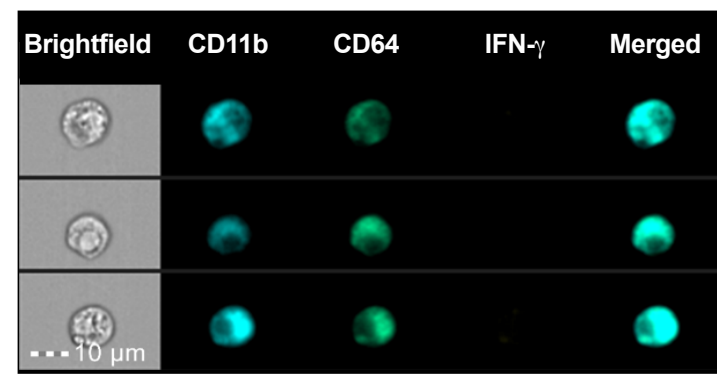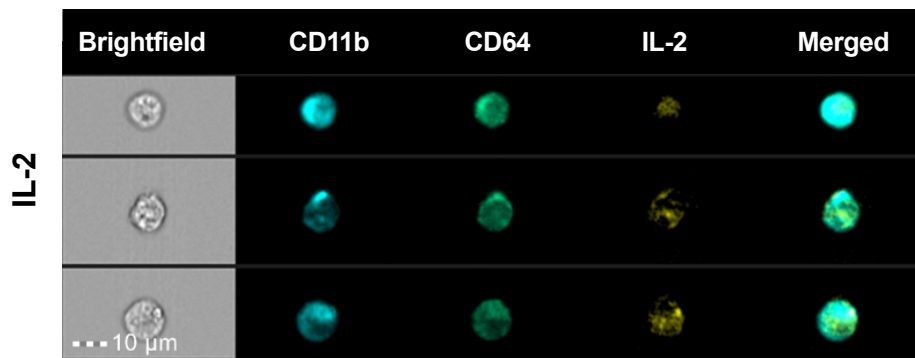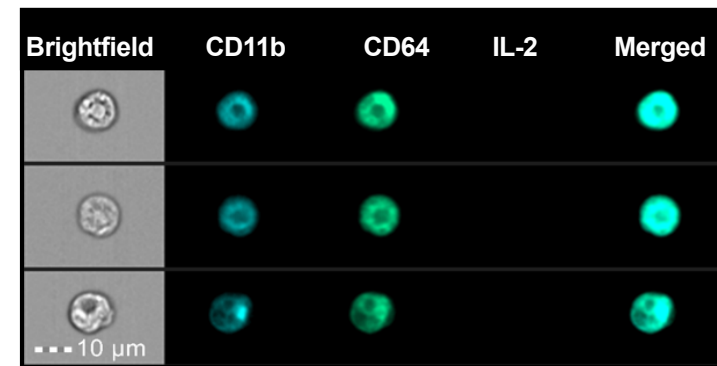

**Unstimulated IL-2**

**Stimulated IL-2**

**Unstimulated IFN- $\gamma$**

**Stimulated IFN- $\gamma$**

**Unstimulated TNF- $\alpha$**

**Stimulated TNF- $\alpha$**

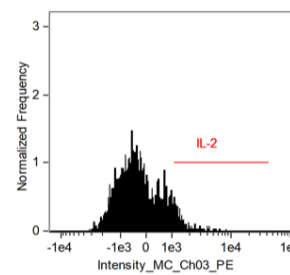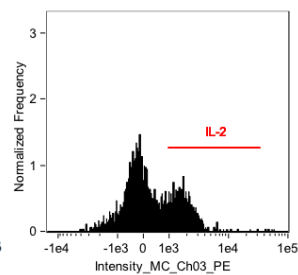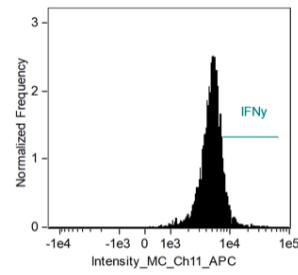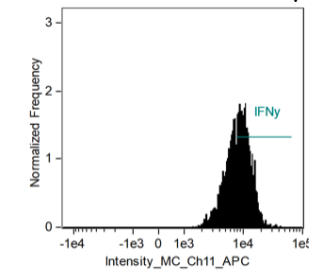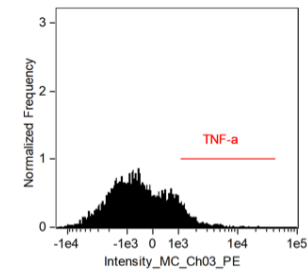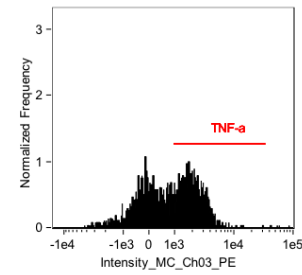

Supplement: ppat.1007358.s002.pdf [file ppat.1007358.s002.pdf]
