# Supplementary material for: IFN-γ immune priming of macrophages in vivo induces prolonged STAT1 binding and protection against Cryptococcus neoformans
Source: PubMed Central journal article supplement (PMC6197699; doi:10.1371/journal.ppat.1007358), 2018-10-10
Supplement: ppat.1007358.s003.pdf [file ppat.1007358.s003.pdf]

**Supplementary Table 1: Gene ontology of RNA-seq in macrophages from H99 $\gamma$  immunized compared to HKH99 $\gamma$  immunized mice 1 day post-challenge**

| Term                                           | Count | %     | PValue   | Genes                                                                                                                                                                                                                   | Fold Enrichment | Bonferroni  | Benjamini | FDR      |
|------------------------------------------------|-------|-------|----------|-------------------------------------------------------------------------------------------------------------------------------------------------------------------------------------------------------------------------|-----------------|-------------|-----------|----------|
| GO:0006955~immune response                     | 31    | 29.81 | 1.11E-24 | IGHG1, IL1F9, CXCL9, RSAD2, TNFSF14, CCL8, OAS2, CXCL11, CXCL10, OASL2, IFNG, TAP1, OASL1, GBP10, BCL3, LTA, GBP8, IRGM1, IL6, GBP6, GBP5, IL27, GBP9, TNFRSF14, CCL12, IL18BP, CCR5, SERPINA3G, GBP4, XCL1, GBP3, GBP2 | 11.76746005     | 1.03E-21    | 1.03E-21  | 1.74E-21 |
| GO:0006952~defense response                    | 18    | 17.31 | 2.43E-10 | IGHG1, IL6, IRGM1, IL27, CXCL9, CCL8, RSAD2, IFI47, CXCL11, CXCL10, CCL12, MEFV, CCR5, IFNG, TAP1, BCL3, NOS2, LTA                                                                                                      | 7.183505639     | 2.24E-07    | 1.12E-07  | 3.79E-07 |
| GO:0005125~cytokine activity                   | 12    | 11.54 | 6.38E-09 | IL1F9, CCL12, IL6, IL27, IFNG, CXCL9, TNFSF14, CCL8, XCL1, CXCL11, LTA, CXCL10                                                                                                                                          | 11.35726496     | 1.07E-06    | 1.07E-06  | 7.76E-06 |
| GO:0005615~extracellular space                 | 16    | 15.38 | 2.41E-08 | IGHG1, IL1F9, IL6, IL27, CXCL9, CCL8, TNFSF14, CXCL11, CXCL10, CCL12, EREG, IFNG, IL15RA, HBEGF, XCL1, LTA                                                                                                              | 6.11741683      | 1.81E-06    | 1.81E-06  | 2.53E-05 |
| GO:0006954~inflammatory response               | 12    | 11.54 | 3.88E-08 | IGHG1, CCL12, IL6, CCR5, MEFV, IL27, CXCL9, CCL8, NOS2, CXCL11, LTA, CXCL10                                                                                                                                             | 9.535438596     | 3.58E-05    | 1.19E-05  | 6.07E-05 |
| GO:0009611~response to wounding                | 14    | 13.46 | 4.77E-08 | IGHG1, CCL12, IL6, MEFV, CCR5, IL27, F3, CXCL9, HBEGF, CCL8, NOS2, CXCL11, LTA, CXCL10                                                                                                                                  | 7.21340816      | 4.40E-05    | 1.10E-05  | 7.45E-05 |
| GO:0003924~GTPase activity                     | 10    | 9.615 | 5.00E-08 | GBP8, GBP6, IGTP, GBP5, IRGM2, GBP9, GBP10, IIGP1, GBP4, GBP3, GBP2                                                                                                                                                     | 13.30929487     | 8.34E-06    | 4.17E-06  | 6.08E-05 |
| GO:0005525~GTP binding                         | 14    | 13.46 | 1.08E-07 | GBP8, GBP6, IRGM1, IRGM2, GBP5, GBP9, IFI47, GM12250, IGTP, GBP10, IIGP1, GBP4, GM4951, GBP3, GBP2                                                                                                                      | 6.737360568     | 1.80E-05    | 6.00E-06  | 1.31E-04 |
| GO:0032561~guanyl ribonucleotide binding       | 14    | 13.46 | 1.44E-07 | GBP8, GBP6, IRGM1, IRGM2, GBP5, GBP9, IFI47, GM12250, IGTP, GBP10, IIGP1, GBP4, GM4951, GBP3, GBP2                                                                                                                      | 6.57031857      | 2.41E-05    | 6.02E-06  | 1.75E-04 |
| GO:0005576~extracellular region                | 26    | 25    | 1.92E-07 | IGHG1, IL1F9, CXCL9, TNFSF14, CCL8, CXCL11, MMP25, TIMP1, CXCL10, ISG15, IFNG, SEMA3E, IL15RA, FGL2, LTA, IL6, VSTM2A, IL27, MMP14, CCL12, WFDC10, IL18BP, EREG, HBEGF, XCL1, LIPF                                      | 3.023660714     | 1.44E-05    | 4.80E-06  | 2.02E-04 |
| GO:0008009~chemokine activity                  | 6     | 5.769 | 2.48E-06 | CCL12, CXCL9, CCL8, XCL1, CXCL11, CXCL10                                                                                                                                                                                | 26.89878543     | 4.13E-04    | 8.27E-05  | 0.00301  |
| GO:0019221~cytokine-mediated signaling pathway | 6     | 5.769 | 1.37E-05 | IL2RB, IL6, EREG, SOCS1, IIGP1, STAT1                                                                                                                                                                                   | 19.15601504     | 0.012591304 | 0.002531  | 0.02147  |
| GO:0009986~cell surface                        | 10    | 9.615 | 2.02E-05 | IL2RB, IL6, CCR5, KLRK1, EMR4, TNFRSF14, MMP14, CD209B, HTR2C, MMP25                                                                                                                                                    | 6.405737705     | 0.001515074 | 3.79E-04  | 0.02121  |

|                                                        |   |       |          |                                                    |             |             |           |         |
|--------------------------------------------------------|---|-------|----------|----------------------------------------------------|-------------|-------------|-----------|---------|
| GO:0009617~response to bacterium                       | 8 | 7.692 | 2.47E-05 | IGHG1, CCR5, IFNG, BCL3, NOS2, STAT1, CD209B, IRG1 | 9.110291653 | 0.022547461 | 0.0037937 | 0.03863 |
| GO:0042035~regulation of cytokine biosynthetic process | 6 | 5.769 | 2.65E-05 | IL6, EREG, IFNG, IRF1, BCL3, CD209B                | 16.76151316 | 0.024143196 | 0.0034853 | 0.0414  |
