# Supplementary material for: IFN-γ immune priming of macrophages in vivo induces prolonged STAT1 binding and protection against Cryptococcus neoformans
Source: PubMed Central journal article supplement (PMC6197699; doi:10.1371/journal.ppat.1007358), 2018-10-10
Supplement: ppat.1007358.s004.pdf [file ppat.1007358.s004.pdf]

**Supplementary Table 2: Gene ontology of RNA-seq in macrophages from H99γ immunized mice compared to HKH99γ immunized mice 3 days post-challenge**

| Term                        | Count | %          | PValue     | Genes                                                                                                                                                                                                                                                                                                                                                                                                                                                                                                                                                                                                                                                                                                                                                                                                                                                                                                                                                                                                                                                                                                                                                                                                                                                                                                                                                                                                                                                                                                                                                                                                                                                                                                                                                               | Fold Enrichment | Bonferroni | Benjamini  | FDR        |
|-----------------------------|-------|------------|------------|---------------------------------------------------------------------------------------------------------------------------------------------------------------------------------------------------------------------------------------------------------------------------------------------------------------------------------------------------------------------------------------------------------------------------------------------------------------------------------------------------------------------------------------------------------------------------------------------------------------------------------------------------------------------------------------------------------------------------------------------------------------------------------------------------------------------------------------------------------------------------------------------------------------------------------------------------------------------------------------------------------------------------------------------------------------------------------------------------------------------------------------------------------------------------------------------------------------------------------------------------------------------------------------------------------------------------------------------------------------------------------------------------------------------------------------------------------------------------------------------------------------------------------------------------------------------------------------------------------------------------------------------------------------------------------------------------------------------------------------------------------------------|-----------------|------------|------------|------------|
| GO:0006955~immune response  | 106   | 12.8484848 | 2.1697E-48 | IL18, TLR1, TNFSF14, CXCL11, C1QC, TLR9, CXCL10, B2M, C1RA, PGLYRP2, OASL2, IFNG, OASL1, GBP10, MX1, MX2, GBP8, GBP6, GBP5, C4B, IL27, GBP9, H2-DMB1, TNFRSF14, C1QB, CCR5, GM10499, CCR2, OAS1B, OAS1A, GBP4, GBP3, OAS1G, GBP2, IFIH1, MILL2, OAS3, CCL8, SP110, OAS2, CX3CL1, CCL5, CD74, ADA, CCL6, SLC11A1, GM8810, PROCR, H2-T10, DHX58, TLR12, H2-Q5, CD8B1, CFB, H2-Q1, TINAGL1, H2-Q6, H2-Q7, FCGR1, PSMB8, PSMB9, H2-EB2, CXCL13, H2-EB1, H2-T22, H2-T23, H2-T24, IGHG1, CD8A, CD1D1, SKAP1, CD1D2, NOD2, TMEM173, SH2D1A, LTA, H2-K1, IL18RAP, SLA2, IL18BP, LAX1, SERPINA3G, H2-BL, IL12A, H2-AA, IL1F9, CSF2, CXCL5, C3, CXCL9, RSAD2, PF4, C1S, MIF, CCL24, TAP2, TAP1, BCL3, CD4, IRGM1, H2-M3, OLR1, SAMHD1, H2-AB1, CCL17, CCL12, C920025E04RIK, FCGR2B, IRF7, IRF8, C1RL, RNF19B                                                                                                                                                                                                                                                                                                                                                                                                                                                                                                                                                                                                                                                                                                                                                                                                                                                                                                                                                                  | 5.39333551      | 5.6478E-45 | 5.6478E-45 | 3.8452E-45 |
| GO:0006952~defense response | 76    | 9.21212121 | 7.0951E-26 | IGHG1, TLR1, PPARG, CD1D1, CXCL11, C1QC, TLR9, CD1D2, B2M, CXCL10, C1RA, NOD2, TMEM173, SH2D1A, PGLYRP2, IFNG, NOS2, DDAH2, MX1, MX2, LTA, H2-K1, IL18RAP, C4B, IL27, SAA3, IFI47, C1QB, SERPINA3N, HIF1A, CCR5, CCR2, PLA2G7, H2-AA, PTAFR, IFIH1, CXCL5, C3, CXCL9, CCL8, RSAD2, SP110, C1S, CCL5, CD24A, CD74, TRF, MIF, CCL24, SLC11A1, IL17A, MEFV, TAP1, IL17F, PYCARD, BCL3, DHX58, TLR12, BMP2, IRGM1, LIPA, OLR1, H2-M3, CFB, H2-Q1, SAMHD1, H2-Q6, H2-Q7, FCGR1, CCL17, ORM1, CCL12, AY761185, FCGR2B, CXCL13, IRF8, C1RL, ALOX5, BMP6                                                                                                                                                                                                                                                                                                                                                                                                                                                                                                                                                                                                                                                                                                                                                                                                                                                                                                                                                                                                                                                                                                                                                                                                                    | 4.0654447       | 1.8469E-22 | 9.2343E-23 | 1.2574E-22 |
| GO:0005886~plasma membrane  | 233   | 28.2424242 | 5.8529E-24 | ADCY3, EFNA1, AIF1, SLC9A4, FGFRL1, L1CAM, CD52, CD209B, AQP1, B2M, LPHN2, LPHN3, PRRT1, ADAM8, GBP5, EFN2, CD40, SSPN, PDCCD1LG2, THY1, JUP, KRT19, RND1, PGM5, CD36, PTRF, CCR5, HTR7, CCR2, HS3ST3B1, MILL2, NRN1, EPHB4, CD74, GPR141, RIMS3, GM8810, ACE, CD69, SLC28A2, CDC42EP5, CD8B1, MAOA, UPK3B, MCAM, SECTM1A, FCGR1, ABCG1, CAMK2N1, PKP3, NOTCH4, SYTL3, TREML2, IGHG1, GPR84, STEAP4, GYPC, LIMA1, ART2B, SLC15A2, GJA4, KCNIP4, MMP25, ART3, NOD2, GPIHBP1, ATP6V0D2, CEACAM1, LAG3, GPR97, HYAL2, CMKLR1, GPR171, MMP15, MMP14, LAX1, H2-BL, KCTD12B, SGCE, GPR182, NKD1, FFAR2, CSF1, GPR65, FPR1, KIT, LY6A, SORBS3, LY6E, MFS7C, SLC3A1, AMICA1, RASA4, KCNE3, IRGM1, SELL, H2-AB1, LY6I, FCGR2B, C920025E04RIK, SLC16A9, HBEGF, PERP, TAPBPL, TJP2, HTR2C, LRP4, SLC22A17, OCLN, SLC22A18, SLC6A4, TLR1, CSPG4, TNFSF14, TLR9, DYSF, A630033H20RIK, MCOLN3, SLC2A1, ROBO4, IL15RA, ELTD1, INADL, MYO6, BST2, STAP2, H2-DMB1, TNFRSF14, TNS3, TNS1, THBD, CLEC12A, GM10499, DLL4, CAR4, GBP2, CAV2, CAV1, ADORA2B, CYSLTR2, ADORA2A, KLRK1, CX3CL1, SRC, SLC2A1, IL12RB1, TTYH2, TEK, H2-T10, LPL, H2-Q5, ACY3, PODXL, H2-Q1, SLC2B1, H2-Q6, H2-Q7, SHANK3, TIGIT, GPR34, H2-EB2, LTB4R1, CD274, ECSCR, H2-EB1, PRICKLE2, H2-T22, H2-T23, H2-T24, CACNA1D, PRX, IER3, CD8A, LEPR, CLDN5, CXCR1, BCAM, CXCR3, SYNGR1, CD1D1, TENC1, SKAP1, CD1D2, EPCAM, PCDH1, TMEM173, RHOC, CALCRL, TIE1, SCN7A, NRG1, GPC1, H2-K1, SLA2, SLC9A3R2, TRPM2, TMEM67, ADRB1, LCK, CLDN1, H2-AA, PTAFR, CPM, RSAD2, PLVAP, CD24A, APLP2, CDH5, APLP1, PRSS8, VCAM1, APLNR, CD9, MARVELD2, RASGRP1, TGM1, TNFRSF18, TGM2, ENO2, CD2, CD4, IL2RG, CD5, ENO1, LY6C1, MS4A4B, ICA1, IL2RB, IL2RA, SLC12A2, H2-M3, OLR1, LY6C2, VWF, KCNN4, GPR114, JAK2, EPOR, GPR116 | 1.81294298      | 1.8612E-21 | 1.8612E-21 | 7.8908E-21 |

|                                                         |     |            |            |                                                                                                                                                                                                                                                                                                                                                                                                                                                                                                                                                                                                                                                                                                                                                                                                                                                                                                                                                                                                                                        |            |            |            |            |
|---------------------------------------------------------|-----|------------|------------|----------------------------------------------------------------------------------------------------------------------------------------------------------------------------------------------------------------------------------------------------------------------------------------------------------------------------------------------------------------------------------------------------------------------------------------------------------------------------------------------------------------------------------------------------------------------------------------------------------------------------------------------------------------------------------------------------------------------------------------------------------------------------------------------------------------------------------------------------------------------------------------------------------------------------------------------------------------------------------------------------------------------------------------|------------|------------|------------|------------|
| GO:0009611~response to wounding                         | 63  | 7.63636364 | 5.0568E-23 | IGHG1, TLR1, PPARG, CXCL11, C1QC, TLR9, CXCL10, C1RA, NOD2, DYSF, NOS2, LTA, F10, GATM, C4B, IL27, SAA3, C1QB, SERPINA3N, HIF1A, THBD, CCR5, F3, CCR2, PLA2G7, PTAFR, CXCL5, C3, CXCL9, CCL8, NINJ1, PF4, CX3CL1, C15, CCL5, CD24A, TRF, MIF, CCL24, ARG1, SLC11A1, IL17A, MEFV, PROCR, IL17F, PYCARD, PAPSS2, TLR12, BMP2, LIPA, OLR1, CFB, FCGR1, SOD2, ORM1, CCL12, VWF, CXCL13, C1RL, HBEGF, ID3, ALOX5, BMP6                                                                                                                                                                                                                                                                                                                                                                                                                                                                                                                                                                                                                      | 4.3509446  | 1.3163E-19 | 4.3876E-20 | 8.9617E-20 |
| GO:0006954~inflammatory response                        | 48  | 5.81818182 | 1.4342E-20 | IGHG1, CXCL5, C3, PPARG, TLR1, CXCL9, CCL8, C15, CCL5, CXCL11, C1QC, CD24A, TRF, TLR9, MIF, CXCL10, CCL24, C1RA, SLC11A1, IL17A, NOD2, MEFV, IL17F, PYCARD, NOS2, LTA, TLR12, BMP2, LIPA, OLR1, C4B, CFB, IL27, SAA3, FCGR1, C1QB, CCL12, ORM1, SERPINA3N, HIF1A, CCR5, CXCL13, CCR2, PLA2G7, C1RL, ALOX5, PTAFR, BMP6                                                                                                                                                                                                                                                                                                                                                                                                                                                                                                                                                                                                                                                                                                                 | 5.11247501 | 3.7333E-17 | 9.3332E-18 | 2.5417E-17 |
| GO:0009986~cell surface                                 | 57  | 6.90909091 | 2.5124E-20 | CD8A, CSPG4, L1CAM, CD1D1, SDC4, CD209B, MMP25, CD1D2, NOD2, ROBO4, GPIHBP1, GPC1, LAG3, CEACAM1, H2-K1, TNFRSF14, CD40, MMP15, MMP14, THY1, CD38, CD36, CCR5, CLEC12A, H2-BL, H2-AA, KLRK1, CX3CL1, KIT, CD24A, CD74, LY6A, SLC11A1, GM8810, IL12RB1, CD69, TNFRSF18, CD2, CD4, IL2RG, SLC03A1, CD5, LY6C1, IL2RB, IL2RA, H2-Q5, CD8B1, H2-M3, SELL, H2-Q1, H2-AB1, H2-Q6, FCGR1, H2-Q7, ABCG1, LY6C2, TIGIT, VWF, FCGR2B, NOTCH4, CD274, HTR2C                                                                                                                                                                                                                                                                                                                                                                                                                                                                                                                                                                                       | 4.22570183 | 7.9893E-18 | 3.9947E-18 | 3.3871E-17 |
| GO:0019882~antigen processing and presentation          | 30  | 3.63636364 | 4.4904E-19 | MILL2, CD1D1, CD74, CD1D2, B2M, GM8810, SLC11A1, PROCR, TAP2, IFNG, H2-T10, H2-K1, H2-Q5, H2-M3, H2-Q1, H2-DMB1, H2-AB1, H2-Q6, H2-Q7, FCGR1, PSMB8, PSMB9, H2-EB2, FCGR2B, PSME1, C920025E04RIK, PSME2, GM10499, H2-BL, H2-EB1, H2-AA, H2-T22, H2-T23, H2-T24, TAPBPL                                                                                                                                                                                                                                                                                                                                                                                                                                                                                                                                                                                                                                                                                                                                                                 | 8.26369884 | 1.1688E-15 | 2.3377E-16 | 7.9579E-16 |
| GO:0002684~positive regulation of immune system process | 42  | 5.09090909 | 2.6735E-17 | IGHG1, ADORA2B, C3, IL18, KLRK1, TNFSF14, C15, CD1D1, CD24A, C1QC, PNP, CD74, ADA, CD1D2, B2M, C1RA, SLC11A1, NOD2, SH2D1A, TAP2, IFNG, CD4, IL2RG, CD5, LAG3, H2-K1, IL2RA, H2-M3, C4B, CFB, EFN1, H2-Q1, CD40, H2-Q6, FCGR1, H2-Q7, PDCD1LG2, THY1, C1QB, CD38, LAX1, LCK, C1RL, IL12A, H2-AA                                                                                                                                                                                                                                                                                                                                                                                                                                                                                                                                                                                                                                                                                                                                        | 4.88601223 | 6.9592E-14 | 1.1599E-14 | 4.738E-14  |
| GO:0009897~external side of plasma membrane             | 43  | 5.21212121 | 3.2193E-17 | CD8A, KLRK1, CSPG4, L1CAM, KIT, CD1D1, CD209B, CD24A, CD74, CD1D2, LY6A, IL12RB1, CD69, ROBO4, TNFRSF18, CD2, CD4, IL2RG, CD5, GPC1, LAG3, H2-K1, LY6C1, IL2RB, H2-Q5, IL2RA, CD8B1, H2-M3, SELL, H2-Q1, H2-AB1, TNFRSF14, CD40, MMP15, MMP14, H2-Q6, FCGR1, H2-Q7, ABCG1, LY6C2, THY1, VWF, CCR5, FCGR2B, CD274, H2-AA, HTR2C                                                                                                                                                                                                                                                                                                                                                                                                                                                                                                                                                                                                                                                                                                         | 4.71981601 | 1.0237E-14 | 3.4124E-15 | 4.3401E-14 |
| GO:0044459~plasma membrane part                         | 134 | 16.2424242 | 3.954E-13  | SLC22A18, OCLN, AIF1, SLC6A4, FGFRL1, CSPG4, L1CAM, AQP1, CD209B, B2M, DYSF, PRRT1, SLC2A1, ROBO4, INADL, GBP5, H2-DMB1, TNFRSF14, CD40, SSPN, THY1, JUP, TNS3, RND1, TNS1, PGM5, PTRF, CCR5, DLL4, GM10499, GBP2, HS3ST3B1, CAV2, CAV1, MILL2, ADORA2A, KLRK1, EPHB4, CD74, RIMS3, SLC02A1, GM8810, IL12RB1, CD69, TEK, H2-T10, SLC28A2, CD8B1, H2-Q5, ACY3, MAOA, H2-Q1, H2-Q6, SLC02B1, H2-Q7, FCGR1, ABCG1, CAMK2N1, SHANK3, H2-EB2, PKP3, NOTCH4, CD274, PRICKLE2, H2-EB1, H2-T22, H2-T23, SYTL3, H2-T24, CACNA1D, IER3, STEAP4, LIMA1, ART2B, CD8A, SLC15A2, LEPR, CLDN5, BCAM, SYNGR1, CD1D1, GJA4, TENC1, CD1D2, EPCAM, PCDH1, RHOC, SCN7A, NRG1, ATP6V0D2, GPC1, GPIHBP1, LAG3, H2-K1, GPR97, MMP15, MMP14, SLC9A3R2, H2-BL, LCK, CLDN1, KCTD12B, H2-AA, SGCE, RSAD2, KIT, CD24A, CDH5, LY6A, SORBS3, MARVELD2, TGM1, TNFRSF18, CD2, CD4, IL2RG, SLC03A1, AMICA1, CD5, KCNE3, LY6C1, MS4A4B, ICA1, IL2RB, IL2RA, H2-M3, SLC12A2, OLR1, SELL, H2-AB1, LY6C2, VWF, KCNN4, C920025E04RIK, FCGR2B, HBEGF, JAK2, PERP, TJP2, HTR2C | 1.85542091 | 1.2572E-10 | 3.143E-11  | 5.33E-10   |

|                                                                     |    |            |            |                                                                                                                                                                                                                                                                                                                                                                                                                                                                                                                                       |            |            |            |            |
|---------------------------------------------------------------------|----|------------|------------|---------------------------------------------------------------------------------------------------------------------------------------------------------------------------------------------------------------------------------------------------------------------------------------------------------------------------------------------------------------------------------------------------------------------------------------------------------------------------------------------------------------------------------------|------------|------------|------------|------------|
| GO:0045087~innate immune response                                   | 26 | 3.15151515 | 1.2456E-12 | IFIH1, C3, TLR1, C1S, SP110, CD1D1, C1QC, TLR9, MIF, CD1D2, C1RA, SLC11A1, TMEM173, NOD2, MX1, MX2, DHX58, TLR12, IRGM1, IL18RAP, CFB, C4B, IL27, SAMHD1, FCGR1, C1QB, C1RL                                                                                                                                                                                                                                                                                                                                                           | 5.8232046  | 3.2425E-09 | 4.6321E-10 | 2.2076E-09 |
| GO:0048002~antigen processing and presentation of peptide antigen   | 16 | 1.93939394 | 2.4654E-12 | H2-K1, H2-M3, H2-Q1, H2-DMB1, H2-AB1, H2-Q6, H2-Q7, FCGR1, CD74, B2M, SLC11A1, FCGR2B, GM10499, TAP2, H2-EB1, H2-AA, H2-T23, TAPBPL                                                                                                                                                                                                                                                                                                                                                                                                   | 10.9553036 | 6.4173E-09 | 8.0217E-10 | 4.3691E-09 |
| GO:0048584~positive regulation of response to stimulus              | 33 | 4          | 6.6194E-12 | IGHG1, ADORA2B, C3, KLRK1, C1S, CD1D1, CD24A, C1QC, PNP, SRC, ADA, CD1D2, B2M, C1RA, SLC11A1, SH2D1A, NOD2, TAP2, TGM2, LAG3, H2-K1, H2-M3, C4B, CFB, H2-Q1, H2-Q6, H2-Q7, FCGR1, THY1, C1QB, LAX1, LCK, C1RL, H2-AA, FABP4, JAK2                                                                                                                                                                                                                                                                                                     | 4.25180634 | 1.723E-08  | 1.9145E-09 | 1.1731E-08 |
| GO:0005615~extracellular space                                      | 60 | 7.27272727 | 8.6042E-12 | IGHG1, GDF3, MSR1, IL18, LEPR, EDN1, TNFSF14, CXCL11, CXCL10, RSP01, TGFB1, IFNG, PRRT1, SEMA3C, IL15RA, GPIHBP1, GPC1, LTA, EGFL7, C4B, IL27, SAA3, IL22, THBD, IL12A, PLA2G7, IL1F9, CSF2, CXCL5, C3, CSF1, CXCL9, CCL8, PF4, CX3CL1, CCL5, TRF, MIF, CCL6, CCL24, PRSS8, ARG1, IL17A, IL17F, ANGPTL4, SPP1, LPL, BMP2, CCL17, CCL12, ORM1, AFP, AY761185, CXCL13, CXCL16, NOTCH4, C1RL, HBEGF, GDF15, BMP6                                                                                                                         | 2.65493678 | 2.7361E-09 | 5.4723E-10 | 1.16E-08   |
| GO:0050778~positive regulation of immune response                   | 28 | 3.39393939 | 9.6343E-12 | IGHG1, C3, KLRK1, C1S, CD1D1, CD24A, C1QC, PNP, ADA, CD1D2, B2M, C1RA, SLC11A1, SH2D1A, NOD2, TAP2, LAG3, H2-K1, H2-M3, CFB, C4B, H2-Q1, H2-Q6, H2-Q7, FCGR1, THY1, C1QB, LAX1, LCK, C1RL, H2-AA                                                                                                                                                                                                                                                                                                                                      | 4.93391431 | 2.5078E-08 | 2.5078E-09 | 1.7074E-08 |
| GO:0005125~cytokine activity                                        | 32 | 3.87878788 | 1.3978E-11 | GDF3, CSF2, IL1F9, CXCL5, IL18, CSF1, CXCL9, TNFSF14, CCL8, PF4, CX3CL1, CCL5, CXCL11, MIF, CCL6, CXCL10, CCL24, IL17A, IFNG, IL17F, LTA, SPP1, BMP2, IL27, IL22, CCL17, CCL12, CXCL13, CXCL16, IL12A, GDF15, BMP6                                                                                                                                                                                                                                                                                                                    | 4.25641642 | 1.019E-08  | 1.019E-08  | 2.1193E-08 |
| GO:0019884~antigen processing and presentation of exogenous antigen | 14 | 1.6969697  | 2.0902E-11 | H2-K1, H2-M3, H2-DMB1, H2-AB1, CD1D1, FCGR1, CD74, CD1D2, B2M, FCGR2B, PSME1, PSME2, TAP2, H2-EB1, H2-AA                                                                                                                                                                                                                                                                                                                                                                                                                              | 11.9823633 | 5.4409E-08 | 4.9463E-09 | 3.7043E-08 |
| GO:0044421~extracellular region part                                | 77 | 9.33333333 | 2.4346E-11 | IGHG1, GDF3, MSR1, PODNL1, LEPR, LTBP4, IL18, EDN1, TNFSF14, CXCL11, MMP25, CXCL10, RSP01, HPSE, TGFB1, IFNG, PRRT1, SEMA3C, IL15RA, GPC1, GPIHBP1, LTA, SPON1, MATN2, EGFL7, C4B, IL27, SAA3, MMP15, MMP14, IL22, THBD, IL12A, PLA2G7, MFAP2, IL1F9, CSF2, CXCL5, C3, CSF1, CXCL9, CCL8, PF4, CX3CL1, CCL5, TRF, CCL6, TIMP1, MIF, PRSS8, CCL24, ARG1, LGALS3BP, IL17A, IL17F, TGM2, SPP1, ANGPTL4, LPL, BMP2, COL4A1, NTN4, NTN1, CCL17, VWF, ORM1, AFP, CCL12, AY761185, CXCL13, CXCL16, KAZALD1, NOTCH4, C1RL, HBEGF, GDF15, BMP6 | 2.24943578 | 7.7421E-09 | 1.2904E-09 | 3.2823E-08 |
| GO:0042611~MHC protein complex                                      | 18 | 2.18181818 | 3.7491E-11 | H2-K1, H2-Q5, MILL2, H2-M3, H2-Q1, H2-DMB1, H2-AB1, CD1D1, H2-Q6, H2-Q7, CD1D2, B2M, GM8810, H2-EB2, C920025E04RIK, GM10499, H2-BL, H2-EB1, H2-T22, H2-AA, H2-T23, H2-T10, H2-T24                                                                                                                                                                                                                                                                                                                                                     | 7.82695785 | 1.1922E-08 | 1.7032E-09 | 5.0545E-08 |
| GO:0002703~regulation of leukocyte mediated immunity                | 20 | 2.42424242 | 3.8452E-11 | IGHG1, H2-K1, ADORA2B, H2-M3, C3, H2-Q1, KLRK1, CD40, CD1D1, H2-Q6, PNP, CD24A, H2-Q7, FCGR1, CD1D2, B2M, GM8810, NOD2, SH2D1A, FCGR2B, H2-BL, TAP2, IFNG, LAG3                                                                                                                                                                                                                                                                                                                                                                       | 6.84706475 | 1.0009E-07 | 8.3409E-09 | 6.8145E-08 |
| GO:0042127~regulation of cell proliferation                         | 58 | 7.03030303 | 6.7729E-11 | PTGS2, MARCKSL1, IL18, FGFRL1, PPARG, EDN1, SLFN3, PNP, SLFN1, CXCL10, SPRY1, IFNG, PRRT1, NOS2, CALCRL, LTA, IL27, EFN1, RASIP1, TNFRSF14, CD40, PDCD1LG2, VASH1, HES1, CD38, TNS3, IL12A, EIF2AK2, CSF2, CAV2, CAV1, ADORA2A, CSF1, IFITM3, PML, KIT, CD24A, CDH5, ADA, MIF, CD9, ALDH1A2, BCL11B, TEK, TGM2, RUNX3, BMP2, IL2RA, TBX3, CRIP2, NTN1, SOD2, FCGR2B, NOTCH4, CD274, FABP4, HBEGF, JAK2                                                                                                                                | 2.58355789 | 1.763E-07  | 1.3561E-08 | 1.2003E-07 |
| GO:0050863~regulation of T cell activation                          | 24 | 2.90909091 | 7.5802E-11 | ADORA2A, IL18, TNFSF14, CD1D1, CD24A, PNP, CD74, ADA, CD1D2, IFNG, IL2RG, CD4, CD5, LAG3, IL2RA, IL27, EFN1, TNFRSF14, PDCD1LG2, THY1, TIGIT, CD274, LCK, IL12A, H2-AA                                                                                                                                                                                                                                                                                                                                                                | 5.32549481 | 1.9731E-07 | 1.4094E-08 | 1.3434E-07 |

|                                                                                                                                                             |    |            |            |                                                                                                                                                                                                     |            |            |            |            |
|-------------------------------------------------------------------------------------------------------------------------------------------------------------|----|------------|------------|-----------------------------------------------------------------------------------------------------------------------------------------------------------------------------------------------------|------------|------------|------------|------------|
| GO:0002706~regulation of lymphocyte mediated immunity                                                                                                       | 19 | 2.3030303  | 8.7524E-11 | IGHG1, H2-K1, H2-M3, C3, H2-Q1, KLRK1, CD40, CD1D1, H2-Q6, PNP, H2-Q7, CD24A, FCGR1, CD1D2, B2M, GM8810, NOD2, SH2D1A, FCGR2B, H2-BL, TAP2, IFNG, LAG3                                              | 7.00507394 | 2.2783E-07 | 1.5188E-08 | 1.5511E-07 |
| GO:0002694~regulation of leukocyte activation                                                                                                               | 28 | 3.39393939 | 1.9278E-10 | ADORA2B, ADORA2A, IL18, TNFSF14, CD1D1, CD24A, PNP, ADA, CD74, CD1D2, IFNG, CD4, IL2RG, CD5, LAG3, IL2RA, IL27, EFN1, TNFRSF14, CD40, PDCD1LG2, THY1, TIGIT, CD38, FCGR2B, CD274, LCK, IL12A, H2-AA | 4.35722302 | 5.0181E-07 | 3.1363E-08 | 3.4165E-07 |
| GO:0051249~regulation of lymphocyte activation                                                                                                              | 27 | 3.27272727 | 2.1464E-10 | ADORA2A, IL18, TNFSF14, CD1D1, CD24A, PNP, ADA, CD74, CD1D2, IFNG, CD4, IL2RG, CD5, LAG3, IL2RA, IL27, EFN1, TNFRSF14, CD40, PDCD1LG2, THY1, TIGIT, CD38, FCGR2B, CD274, LCK, IL12A, H2-AA          | 4.49338624 | 5.587E-07  | 3.2865E-08 | 3.8038E-07 |
| GO:0002699~positive regulation of immune effector process                                                                                                   | 16 | 1.93939394 | 2.5375E-10 | IGHG1, H2-K1, ADORA2B, H2-M3, C3, H2-Q1, KLRK1, CD1D1, H2-Q6, PNP, H2-Q7, CD24A, FCGR1, CD1D2, B2M, NOD2, SH2D1A, TAP2, LAG3                                                                        | 8.33555709 | 6.6052E-07 | 3.6696E-08 | 4.497E-07  |
| GO:0050865~regulation of cell activation                                                                                                                    | 28 | 3.39393939 | 2.6106E-10 | ADORA2B, ADORA2A, IL18, TNFSF14, CD1D1, CD24A, PNP, ADA, CD74, CD1D2, IFNG, CD4, IL2RG, CD5, LAG3, IL2RA, IL27, EFN1, TNFRSF14, CD40, PDCD1LG2, THY1, TIGIT, CD38, FCGR2B, CD274, LCK, IL12A, H2-AA | 4.30136119 | 6.7953E-07 | 3.5765E-08 | 4.6264E-07 |
| GO:0002705~positive regulation of leukocyte mediated immunity                                                                                               | 15 | 1.81818182 | 3.4444E-10 | IGHG1, H2-K1, H2-M3, C3, H2-Q1, KLRK1, CD1D1, H2-Q6, PNP, H2-Q7, CD24A, FCGR1, CD1D2, B2M, NOD2, SH2D1A, TAP2, LAG3                                                                                 | 8.98677249 | 8.9657E-07 | 4.4828E-08 | 6.1041E-07 |
| GO:0002708~positive regulation of lymphocyte mediated immunity                                                                                              | 15 | 1.81818182 | 3.4444E-10 | IGHG1, H2-K1, H2-M3, C3, H2-Q1, KLRK1, CD1D1, H2-Q6, PNP, H2-Q7, CD24A, FCGR1, CD1D2, B2M, NOD2, SH2D1A, TAP2, LAG3                                                                                 | 8.98677249 | 8.9657E-07 | 4.4828E-08 | 6.1041E-07 |
| GO:0002821~positive regulation of adaptive immune response                                                                                                  | 14 | 1.6969697  | 4.1129E-10 | IGHG1, H2-K1, H2-M3, C3, H2-Q1, CD1D1, H2-Q6, PNP, H2-Q7, CD24A, FCGR1, ADA, CD1D2, B2M, SLC11A1, NOD2, TAP2                                                                                        | 9.86782861 | 1.0706E-06 | 5.098E-08  | 7.2889E-07 |
| GO:0002824~positive regulation of adaptive immune response based on somatic recombination of immune receptors built from immunoglobulin superfamily domains | 14 | 1.6969697  | 4.1129E-10 | IGHG1, H2-K1, H2-M3, C3, H2-Q1, CD1D1, H2-Q6, PNP, H2-Q7, CD24A, FCGR1, ADA, CD1D2, B2M, SLC11A1, NOD2, TAP2                                                                                        | 9.86782861 | 1.0706E-06 | 5.098E-08  | 7.2889E-07 |
| GO:0002822~regulation of adaptive immune response based on somatic recombination of immune receptors built from immunoglobulin superfamily domains          | 17 | 2.06060606 | 5.8961E-10 | IGHG1, H2-K1, H2-M3, C3, H2-Q1, CD40, CD1D1, H2-Q6, PNP, H2-Q7, CD24A, FCGR1, ADA, CD1D2, B2M, SLC11A1, NOD2, FCGR2B, TAP2, IFNG                                                                    | 7.2750063  | 1.5348E-06 | 6.9762E-08 | 1.0449E-06 |
| GO:0002819~regulation of adaptive immune response                                                                                                           | 17 | 2.06060606 | 5.8961E-10 | IGHG1, H2-K1, H2-M3, C3, H2-Q1, CD40, CD1D1, H2-Q6, PNP, H2-Q7, CD24A, FCGR1, ADA, CD1D2, B2M, SLC11A1, NOD2, FCGR2B, TAP2, IFNG                                                                    | 7.2750063  | 1.5348E-06 | 6.9762E-08 | 1.0449E-06 |
| GO:0050870~positive regulation of T cell activation                                                                                                         | 18 | 2.18181818 | 1.0143E-09 | IL2RA, EFN1, IL18, TNFSF14, CD1D1, PNP, CD24A, ADA, CD74, PDCD1LG2, CD1D2, THY1, IFNG, LCK, IL12A, H2-AA, CD4, IL2RG, CD5                                                                           | 6.53583454 | 2.6402E-06 | 1.1479E-07 | 1.7975E-06 |
| GO:0002460~adaptive immune response based on somatic recombination of immune receptors built from immunoglobulin superfamily domains                        | 20 | 2.42424242 | 1.1597E-09 | IGHG1, CD8A, C3, C4B, CFB, IL18, C1S, C1QC, FCGR1, CD74, C1QB, SLC11A1, C1RA, NOD2, IL18BP, FCGR2B, IRF7, C1RL, BCL3, H2-AA                                                                         | 5.70588729 | 3.0188E-06 | 1.2578E-07 | 2.0553E-06 |
| GO:0002250~adaptive immune response                                                                                                                         | 20 | 2.42424242 | 1.1597E-09 | IGHG1, CD8A, C3, C4B, CFB, IL18, C1S, C1QC, FCGR1, CD74, C1QB, SLC11A1, C1RA, NOD2, IL18BP, FCGR2B, IRF7, C1RL, BCL3, H2-AA                                                                         | 5.70588729 | 3.0188E-06 | 1.2578E-07 | 2.0553E-06 |
| GO:0008009~chemokine activity                                                                                                                               | 14 | 1.6969697  | 2.0752E-09 | CXCL5, CXCL9, CCL8, PF4, CX3CL1, CXCL11, CCL5, CCL17, CXCL10, CCL6, CCL24, CCL12, CXCL13, CXCL16                                                                                                    | 8.82086297 | 1.5128E-06 | 7.564E-07  | 3.1465E-06 |
| GO:0002697~regulation of immune effector process                                                                                                            | 20 | 2.42424242 | 2.6771E-09 | IGHG1, H2-K1, ADORA2B, H2-M3, C3, H2-Q1, KLRK1, CD40, CD1D1, H2-Q6, PNP, CD24A, H2-Q7, FCGR1, CD1D2, B2M, GM8810, NOD2, SH2D1A, FCGR2B, H2-BL, TAP2, IFNG, LAG3                                     | 5.44652878 | 6.9686E-06 | 2.7874E-07 | 4.7444E-06 |
| GO:0042379~chemokine receptor binding                                                                                                                       | 14 | 1.6969697  | 2.9954E-09 | CXCL5, CXCL9, CCL8, PF4, CX3CL1, CXCL11, CCL5, CCL17, CXCL10, CCL6, CCL24, CCL12, CXCL13, CXCL16                                                                                                    | 8.59468699 | 2.1836E-06 | 7.2788E-07 | 4.5418E-06 |
| GO:0002696~positive regulation of leukocyte activation                                                                                                      | 21 | 2.54545455 | 3.5062E-09 | IL2RA, ADORA2B, EFN1, IL18, TNFSF14, CD40, CD1D1, PNP, CD24A, ADA, CD74, PDCD1LG2, CD1D2, THY1, CD38, IFNG, LCK, IL12A, H2-AA, CD4, IL2RG, CD5                                                      | 5.08342686 | 9.1266E-06 | 3.5103E-07 | 6.2137E-06 |

|                                                                             |    |            |            |                                                                                                                                                                                                              |            |            |            |            |
|-----------------------------------------------------------------------------|----|------------|------------|--------------------------------------------------------------------------------------------------------------------------------------------------------------------------------------------------------------|------------|------------|------------|------------|
| GO:0051251~positive regulation of lymphocyte activation                     | 20 | 2.42424242 | 8.5707E-09 | IL2RA, EFN1, IL18, TNFSF14, CD40, CD1D1, PNP, CD24A, ADA, CD74, PDCD1LG2, CD1D2, THY1, CD38, IFNG, LCK, IL12A, H2-AA, CD4, IL2RG, CD5                                                                        | 5.09887801 | 2.2309E-05 | 7.9677E-07 | 1.5189E-05 |
| GO:0002478~antigen processing and presentation of exogenous peptide antigen | 11 | 1.33333333 | 1.0184E-08 | H2-K1, H2-M3, FCGR2B, TAP2, H2-EB1, H2-AA, H2-DMB1, H2-AB1, FCGR1, CD74, B2M                                                                                                                                 | 11.461391  | 2.651E-05  | 9.1414E-07 | 1.8049E-05 |
| GO:0002449~lymphocyte mediated immunity                                     | 18 | 2.18181818 | 1.0453E-08 | IGHG1, CD8A, C3, C4B, CFB, C1S, C1QC, FCGR1, CD74, C1QB, SLC11A1, C1RA, NOD2, FCGR2B, IRF7, C1RL, BCL3, H2-AA                                                                                                | 5.67585631 | 2.7209E-05 | 9.0697E-07 | 1.8525E-05 |
| GO:0016064~immunoglobulin mediated immune response                          | 16 | 1.93939394 | 3.1395E-08 | IGHG1, C3, C4B, CFB, C1S, C1QC, FCGR1, CD74, C1QB, C1RA, NOD2, FCGR2B, IRF7, C1RL, BCL3, H2-AA                                                                                                               | 6.08627978 | 8.1719E-05 | 2.6362E-06 | 5.5639E-05 |
| GO:0019724~B cell mediated immunity                                         | 16 | 1.93939394 | 4.9347E-08 | IGHG1, C3, C4B, CFB, C1S, C1QC, FCGR1, CD74, C1QB, C1RA, NOD2, FCGR2B, IRF7, C1RL, BCL3, H2-AA                                                                                                               | 5.89900963 | 0.00012844 | 4.0141E-06 | 8.7453E-05 |
| GO:0002252~immune effector process                                          | 22 | 2.66666667 | 5.1112E-08 | IGHG1, CD8A, C3, C4B, CFB, H2-Q1, SAMHD1, RSAD2, C1S, H2-Q6, FCGR1, C1QC, H2-Q7, CD74, C1QB, SLC11A1, C1RA, NOD2, FCGR2B, LAX1, IRF7, C1RL, H2-AA, BCL3                                                      | 4.18431735 | 0.00013304 | 4.0316E-06 | 9.058E-05  |
| GO:0042330~taxis                                                            | 20 | 2.42424242 | 1.0604E-07 | CXCL5, FPR1, CCL8, CXCR1, PF4, CX3CL1, KIT, CXCL11, CCL5, CCL17, CCL6, CXCL10, CCL24, CCL12, CXCL13, CXCL16, SEMA3F, IFNG, ECSCR, PTAFR                                                                      | 4.39719755 | 0.00027598 | 8.1181E-06 | 0.00018792 |
| GO:0006935~chemotaxis                                                       | 20 | 2.42424242 | 1.0604E-07 | CXCL5, FPR1, CCL8, CXCR1, PF4, CX3CL1, KIT, CXCL11, CCL5, CCL17, CCL6, CXCL10, CCL24, CCL12, CXCL13, CXCL16, SEMA3F, IFNG, ECSCR, PTAFR                                                                      | 4.39719755 | 0.00027598 | 8.1181E-06 | 0.00018792 |
| GO:0012502~induction of programmed cell death                               | 25 | 3.03030303 | 1.0861E-07 | IGHG1, ADORA2A, IL18, CIDEA, PML, NR4A1, GZMB, SP110, FCGR1, CD24A, CIDEA, PLEKHF1, CASP4, LCK, CASP12, PYCARD, RIPK3, TGM2, BCL3, BIK, PERP, CD5, LTA, RUNX3, IFI204                                        | 3.58753393 | 0.00028268 | 8.0776E-06 | 0.00019248 |
| GO:0006917~induction of apoptosis                                           | 25 | 3.03030303 | 1.0861E-07 | IGHG1, ADORA2A, IL18, CIDEA, PML, NR4A1, GZMB, SP110, FCGR1, CD24A, CIDEA, PLEKHF1, CASP4, LCK, CASP12, PYCARD, RIPK3, TGM2, BCL3, BIK, PERP, CD5, LTA, RUNX3, IFI204                                        | 3.58753393 | 0.00028268 | 8.0776E-06 | 0.00019248 |
| GO:0002443~leukocyte mediated immunity                                      | 18 | 2.18181818 | 1.2521E-07 | IGHG1, CD8A, C3, C4B, CFB, C1S, C1QC, FCGR1, CD74, C1QB, SLC11A1, C1RA, NOD2, FCGR2B, IRF7, C1RL, BCL3, H2-AA                                                                                                | 4.84679864 | 0.00032587 | 9.0533E-06 | 0.0002219  |
| GO:0042612~MHC class I protein complex                                      | 13 | 1.57575758 | 1.5969E-07 | H2-K1, MILL2, H2-Q5, H2-M3, H2-Q1, CD1D1, H2-Q6, H2-Q7, CD1D2, B2M, GM8810, C920025E04RIK, H2-BL, GM10499, H2-T22, H2-T10, H2-T23, H2-T24                                                                    | 6.99870834 | 5.0781E-05 | 6.3478E-06 | 0.00021529 |
| GO:0001912~positive regulation of leukocyte mediated cytotoxicity           | 10 | 1.21212121 | 1.7157E-07 | H2-K1, SH2D1A, H2-M3, TAP2, H2-Q1, KLRK1, CD1D1, H2-Q6, H2-Q7, PNP, LAG3, CD1D2, B2M                                                                                                                         | 10.4194464 | 0.00044651 | 1.207E-05  | 0.00030406 |
| GO:0031343~positive regulation of cell killing                              | 10 | 1.21212121 | 1.7157E-07 | H2-K1, SH2D1A, H2-M3, TAP2, H2-Q1, KLRK1, CD1D1, H2-Q6, H2-Q7, PNP, LAG3, CD1D2, B2M                                                                                                                         | 10.4194464 | 0.00044651 | 1.207E-05  | 0.00030406 |
| GO:0001944~vasculature development                                          | 31 | 3.75757576 | 1.808E-07  | CAV1, PGF, LEPR, IL18, EDN1, CSPG4, ANPEP, CX3CL1, GJA4, CDH5, ALDH1A2, WARS, HEY1, ROBO4, TGM2, SEMA3C, SOX18, NOS2, TBX3, EGFL7, EPAS1, SOCS3, EFN2, MMP14, VASH1, THY1, HIF1A, DLL4, NOTCH4, ECSCR, HBEGF | 2.9716261  | 0.00047052 | 1.2385E-05 | 0.00032042 |

|                                                                    |     |            |            |                                                                                                                                                                                                                                                                                                                                                                                                                                                                                                                                                                                                                                                                                                                                                                                                                                    |            |            |            |            |
|--------------------------------------------------------------------|-----|------------|------------|------------------------------------------------------------------------------------------------------------------------------------------------------------------------------------------------------------------------------------------------------------------------------------------------------------------------------------------------------------------------------------------------------------------------------------------------------------------------------------------------------------------------------------------------------------------------------------------------------------------------------------------------------------------------------------------------------------------------------------------------------------------------------------------------------------------------------------|------------|------------|------------|------------|
| GO:0005576~extracellular region                                    | 118 | 14.3030303 | 1.8233E-07 | GDF3, PGF, LTBP4, IL18, EDN1, TNFSF14, RETNLG, CXCL11, C1QC, CXCL10, B2M, ISG15, PGLYRP2, IFNG, TGFB1, PRRT1, IL15RA, SPON1, MATN2, F10, C4B, IL27, CD40, IL22, VASH1, C1QB, THBD, WFDC10, CST7, WFDC1, MFAP2, CCL8, CX3CL1, CCL5, TRF, CCL6, TIMP1, ARG1, LGALS3BP, ACE, FOLR4, IL17A, IL17F, FGL2, PLTP, ANGPTL4, SPP1, LPL, BMP2, CFB, NTN4, TINAGL1, NTN1, SECTM1A, LCN2, AY761185, CXCL13, CXCL16, NOTCH4, BMP6, IGHG1, MSR1, PODNL1, LEPR, SPINK2, HP, INSL6, MMP25, RSPO1, HPSE, SEMA3G, SEMA3F, SEMA3E, SEMA3C, GPC1, GPIHBP1, LTA, EGFL7, SAA3, MMP15, MMP14, MCPT8, SERPINA3N, IL18BP, IL12A, PLA2G7, SLPI, IL1F9, CSF2, CXCL5, C3, CSF1, CXCL9, PF4, MIF, PRSS8, CCL24, C1QTNF6, TNFRSF18, CD2, PYCARD, TGM2, VSTM2A, COL4A1, OLR1, CCL17, VWF, AFP, CCL12, ORM1, FCGR2B, KAZALD1, C1RL, HBEGF, EPOR, GDF15, LIPF, ENHO | 1.58816843 | 5.7978E-05 | 6.4422E-06 | 0.00024581 |
| GO:0031341~regulation of cell killing                              | 11  | 1.33333333 | 2.0532E-07 | H2-K1, H2-M3, H2-Q1, KLRK1, H2-Q6, CD1D1, PNP, H2-Q7, B2M, CD1D2, GM8810, SH2D1A, TAP2, H2-BL, LAG3                                                                                                                                                                                                                                                                                                                                                                                                                                                                                                                                                                                                                                                                                                                                | 8.78706643 | 0.00053431 | 1.3704E-05 | 0.00036387 |
| GO:0001910~regulation of leukocyte mediated cytotoxicity           | 11  | 1.33333333 | 2.0532E-07 | H2-K1, H2-M3, H2-Q1, KLRK1, H2-Q6, CD1D1, PNP, H2-Q7, B2M, CD1D2, GM8810, SH2D1A, TAP2, H2-BL, LAG3                                                                                                                                                                                                                                                                                                                                                                                                                                                                                                                                                                                                                                                                                                                                | 8.78706643 | 0.00053431 | 1.3704E-05 | 0.00036387 |
| GO:0002711~positive regulation of T cell mediated immunity         | 8   | 0.96969697 | 2.8919E-07 | H2-K1, H2-M3, TAP2, H2-Q1, CD1D1, H2-Q6, H2-Q7, CD24A, PNP, CD1D2, B2M                                                                                                                                                                                                                                                                                                                                                                                                                                                                                                                                                                                                                                                                                                                                                             | 14.7475241 | 0.00075249 | 1.8819E-05 | 0.00051251 |
| GO:0001568~blood vessel development                                | 30  | 3.63636364 | 3.5514E-07 | CAV1, PGF, LEPR, IL18, EDN1, CSPG4, ANPEP, CX3CL1, GJA4, CDH5, ALDH1A2, WARS, HEY1, ROBO4, TGM2, SEMA3C, SOX18, NOS2, TBX3, EGFL7, EPAS1, SOCS3, MMP14, VASH1, THY1, HIF1A, DLL4, NOTCH4, ECSCR, HBEGF                                                                                                                                                                                                                                                                                                                                                                                                                                                                                                                                                                                                                             | 2.94648278 | 0.000924   | 2.2547E-05 | 0.00062937 |
| GO:0001916~positive regulation of T cell mediated cytotoxicity     | 7   | 0.84848485 | 3.84E-07   | H2-K1, H2-M3, TAP2, H2-Q1, CD1D1, H2-Q6, H2-Q7, PNP, CD1D2, B2M                                                                                                                                                                                                                                                                                                                                                                                                                                                                                                                                                                                                                                                                                                                                                                    | 18.6392318 | 0.00099905 | 2.3799E-05 | 0.00068053 |
| GO:0051240~positive regulation of multicellular organismal process | 23  | 2.78787879 | 1.1002E-06 | CAV1, PTPRM, ADORA2B, H2-M3, ADORA2A, CSF1, IL18, EDN1, H2-Q1, KLRK1, CX3CL1, CD40, H2-Q6, H2-Q7, ADA, TRF, TIGIT, SLC11A1, NOD2, ADRB1, IFNG, PYCARD, BCL3, HTR2C, LTA                                                                                                                                                                                                                                                                                                                                                                                                                                                                                                                                                                                                                                                            | 3.38152584 | 0.00285969 | 6.6598E-05 | 0.00194974 |
| GO:0001817~regulation of cytokine production                       | 21  | 2.54545455 | 1.2219E-06 | ADORA2B, H2-M3, IL18, PPARG, H2-Q1, TLR1, KLRK1, CX3CL1, CD40, CD1D1, CD209B, H2-Q6, CD24A, H2-Q7, TLR9, CD1D2, TIGIT, SLC11A1, NOD2, IFNG, PYCARD, IRF1, BCL3, LAG3                                                                                                                                                                                                                                                                                                                                                                                                                                                                                                                                                                                                                                                               | 3.62057021 | 0.00317568 | 7.2287E-05 | 0.00216552 |
| GO:0006959~humoral immune response                                 | 13  | 1.57575758 | 1.6775E-06 | IGHG1, C1QB, C1RA, SH2D1A, C3, C4B, CFB, CCR2, C1RL, BCL3, C1S, C1QC, LTA                                                                                                                                                                                                                                                                                                                                                                                                                                                                                                                                                                                                                                                                                                                                                          | 5.76928604 | 0.00435695 | 9.7028E-05 | 0.00297279 |
| GO:0001914~regulation of T cell mediated cytotoxicity              | 7   | 0.84848485 | 1.9657E-06 | H2-K1, H2-M3, TAP2, H2-Q1, CD1D1, H2-Q6, H2-Q7, PNP, CD1D2, B2M                                                                                                                                                                                                                                                                                                                                                                                                                                                                                                                                                                                                                                                                                                                                                                    | 15.2502806 | 0.0051037  | 0.00011123 | 0.00348359 |
| GO:0009617~response to bacterium                                   | 22  | 2.66666667 | 2.2336E-06 | IGHG1, H2-K1, H2-M3, TLR1, SP110, STAT1, CD209B, CD24A, FCGR1, B2M, SLC11A1, NOD2, THBD, CCR5, TAP2, PGLYRP2, IFNG, IRF8, BCL3, NOS2, IRG1, PTAFR                                                                                                                                                                                                                                                                                                                                                                                                                                                                                                                                                                                                                                                                                  | 3.35811456 | 0.00579711 | 0.00012369 | 0.00395826 |
| GO:0008285~negative regulation of cell proliferation               | 27  | 3.27272727 | 2.2437E-06 | CAV2, CAV1, PTGS2, ADORA2A, IFITM3, FGFR1, PPARG, PML, SLFN3, CD24A, CDH5, SLFN1, CD9, SPRY1, BCL11B, LTA, RUNX3, BMP2, IL2RA, TNFRSF14, VASH1, PDCD1LG2, SOD2, FCGR2B, CD274, JAK2, EIF2AK2                                                                                                                                                                                                                                                                                                                                                                                                                                                                                                                                                                                                                                       | 2.88860544 | 0.00582343 | 0.00012167 | 0.00397628 |
| GO:0001525~angiogenesis                                            | 20  | 2.42424242 | 2.5119E-06 | EPAS1, EGFL7, PGF, LEPR, IL18, EDN1, CSPG4, ANPEP, CX3CL1, MMP14, VASH1, THY1, WARS, HIF1A, DLL4, NOTCH4, ECSCR, ROBO4, HBEGF, SOX18                                                                                                                                                                                                                                                                                                                                                                                                                                                                                                                                                                                                                                                                                               | 3.60371829 | 0.00651716 | 0.00013343 | 0.00445151 |
| GO:0009615~response to virus                                       | 15  | 1.81818182 | 2.5531E-06 | IFIH1, H2-Q1, SAMHD1, RSAD2, H2-Q6, H2-Q7, TLR9, LCN2, ISG15, IFI27L2A, IRF7, IFNG, OAS1B, OAS1A, EIF2AK2, MX1, MX2                                                                                                                                                                                                                                                                                                                                                                                                                                                                                                                                                                                                                                                                                                                | 4.72988026 | 0.00662366 | 0.00013291 | 0.00452449 |
| GO:0048514~blood vessel morphogenesis                              | 25  | 3.03030303 | 2.5603E-06 | CAV1, EGFL7, EPAS1, PGF, IL18, LEPR, EDN1, CSPG4, ANPEP, CX3CL1, MMP14, VASH1, THY1, WARS, HIF1A, HEY1, DLL4, NOTCH4, ECSCR, ROBO4, TGM2, SEMA3C, HBEGF, SOX18, NOS2                                                                                                                                                                                                                                                                                                                                                                                                                                                                                                                                                                                                                                                               | 3.02584932 | 0.00664234 | 0.00013067 | 0.00453729 |

|                                                         |    |            |            |                                                                                                                                                                                                                                                                                                                            |            |            |            |            |
|---------------------------------------------------------|----|------------|------------|----------------------------------------------------------------------------------------------------------------------------------------------------------------------------------------------------------------------------------------------------------------------------------------------------------------------------|------------|------------|------------|------------|
| GO:0008284~positive regulation of cell proliferation    | 31 | 3.75757576 | 2.7371E-06 | CSF2, MARCKSL1, IL18, CSF1, EDN1, KIT, CD24A, PNP, ADA, CXCL10, ALDH1A2, IFNG, PRRT1, TGM2, CALCRL, LTA, IL2RA, TBX3, CRIP2, EFN1, RASIP1, CD40, NTN1, PDCD1LG2, HES1, CD38, TNS3, NOTCH4, IL12A, HBEGF, FABP4                                                                                                             | 2.61586805 | 0.00709925 | 0.000137   | 0.00485051 |
| GO:0043067~regulation of programmed cell death          | 48 | 5.81818182 | 3.6844E-06 | IGHG1, XRCC5, TRAF1, CSF2, IFIH1, ADORA2A, IL18, PML, CX3CL1, KIT, SP110, PNP, CD24A, CD74, ADA, SRC, TIMP1, NOD2, CASP4, BCL11B, TGM2, PYCARD, BCL3, CD5, LTA, RUNX3, ANGPTL4, SPP1, IL2RB, IL2RA, TBX3, CIDEB, NR4A1, GZMB, PIM2, FCGR1, SOD2, CIDEA, CARD10, PLEKHF1, HIF1A, LCK, CASP12, RIPK3, BIK, ID3, PERP, IFI204 | 2.05411943 | 0.00954459 | 0.00018094 | 0.00652925 |
| GO:0042325~regulation of phosphorylation                | 31 | 3.75757576 | 4.19E-06   | CAV1, ADORA2A, EFNA1, CSF1, EDN1, TLR1, CSPG4, KIT, CD24A, APLP2, CD74, PRKAR2B, SLC11A1, SPRY1, NOD2, IFNG, CD4, NRG1, FAM129A, CEACAM1, PPP1R14A, BMP2, SOCS3, SOCS1, TNFRSF14, IL22, THY1, CARD10, CDKN1C, FABP4, JAK2                                                                                                  | 2.56174664 | 0.01084729 | 0.00020195 | 0.00742524 |
| GO:0010941~regulation of cell death                     | 48 | 5.81818182 | 4.2366E-06 | IGHG1, XRCC5, TRAF1, CSF2, IFIH1, ADORA2A, IL18, PML, CX3CL1, KIT, SP110, PNP, CD24A, CD74, ADA, SRC, TIMP1, NOD2, CASP4, BCL11B, TGM2, PYCARD, BCL3, CD5, LTA, RUNX3, ANGPTL4, SPP1, IL2RB, IL2RA, TBX3, CIDEB, NR4A1, GZMB, PIM2, FCGR1, SOD2, CIDEA, CARD10, PLEKHF1, HIF1A, LCK, CASP12, RIPK3, BIK, ID3, PERP, IFI204 | 2.04317385 | 0.01096726 | 0.00020049 | 0.00750782 |
| GO:0002709~regulation of T cell mediated immunity       | 8  | 0.96969697 | 4.4682E-06 | H2-K1, H2-M3, TAP2, H2-Q1, CD1D1, H2-Q6, H2-Q7, CD24A, PNP, CD1D2, B2M                                                                                                                                                                                                                                                     | 10.6509896 | 0.0115633  | 0.00020767 | 0.00791821 |
| GO:0050670~regulation of lymphocyte proliferation       | 15 | 1.81818182 | 4.8058E-06 | IL2RA, IL27, IL18, EFN1, TNFRSF14, CD40, PNP, CD24A, PDCD1LG2, ADA, CD38, FCGR2B, CD274, IFNG, IL12A                                                                                                                                                                                                                       | 4.49338624 | 0.01243158 | 0.00021944 | 0.00851649 |
| GO:0032944~regulation of mononuclear cell proliferation | 15 | 1.81818182 | 4.8058E-06 | IL2RA, IL27, IL18, EFN1, TNFRSF14, CD40, PNP, CD24A, PDCD1LG2, ADA, CD38, FCGR2B, CD274, IFNG, IL12A                                                                                                                                                                                                                       | 4.49338624 | 0.01243158 | 0.00021944 | 0.00851649 |
| GO:0043065~positive regulation of apoptosis             | 28 | 3.39393939 | 4.9005E-06 | IGHG1, ADORA2A, IL18, PML, SP110, CD24A, SRC, CASP4, PYCARD, TGM2, BCL3, CD5, RUNX3, LTA, IL2RA, CIDEB, NR4A1, GZMB, FCGR1, CIDEA, PLEKHF1, CASP12, LCK, RIPK3, BIK, ID3, PERP, IFI204                                                                                                                                     | 2.70569494 | 0.01267506 | 0.00021991 | 0.00868435 |
| GO:0043068~positive regulation of programmed cell death | 28 | 3.39393939 | 5.7192E-06 | IGHG1, ADORA2A, IL18, PML, SP110, CD24A, SRC, CASP4, PYCARD, TGM2, BCL3, CD5, RUNX3, LTA, IL2RA, CIDEB, NR4A1, GZMB, FCGR1, CIDEA, PLEKHF1, CASP12, LCK, RIPK3, BIK, ID3, PERP, IFI204                                                                                                                                     | 2.68404938 | 0.01477694 | 0.00025229 | 0.01013516 |
| GO:0042981~regulation of apoptosis                      | 47 | 5.6969697  | 5.9112E-06 | IGHG1, XRCC5, TRAF1, CSF2, IFIH1, ADORA2A, IL18, PML, CX3CL1, SP110, PNP, CD24A, CD74, ADA, SRC, TIMP1, NOD2, CASP4, BCL11B, TGM2, PYCARD, BCL3, CD5, LTA, RUNX3, ANGPTL4, SPP1, IL2RB, IL2RA, TBX3, CIDEB, NR4A1, GZMB, PIM2, FCGR1, SOD2, CIDEA, CARD10, PLEKHF1, HIF1A, LCK, CASP12, RIPK3, BIK, ID3, PERP, IFI204      | 2.03678508 | 0.01526917 | 0.00025642 | 0.01047536 |
| GO:0070663~regulation of leukocyte proliferation        | 15 | 1.81818182 | 6.4891E-06 | IL2RA, IL27, IL18, EFN1, TNFRSF14, CD40, PNP, CD24A, PDCD1LG2, ADA, CD38, FCGR2B, CD274, IFNG, IL12A                                                                                                                                                                                                                       | 4.38379146 | 0.01674933 | 0.00027687 | 0.01149938 |
| GO:0010942~positive regulation of cell death            | 28 | 3.39393939 | 6.6166E-06 | IGHG1, ADORA2A, IL18, PML, SP110, CD24A, SRC, CASP4, PYCARD, TGM2, BCL3, CD5, RUNX3, LTA, IL2RA, CIDEB, NR4A1, GZMB, FCGR1, CIDEA, PLEKHF1, CASP12, LCK, RIPK3, BIK, ID3, PERP, IFI204                                                                                                                                     | 2.6627474  | 0.01707558 | 0.00027775 | 0.0117253  |
| GO:0007626~locomotory behavior                          | 27 | 3.27272727 | 7.418E-06  | CXCL5, ADORA2A, FPR1, CXCR1, SOBP, CCL8, PF4, KIT, CX3CL1, CXCL11, CCL5, APLP2, CCL6, CXCL10, CCL24, MCOLN3, SEMA3F, IFNG, NRG1, MYO6, CCL17, SOD2, CCL12, CXCL13, CXCL16, ECSCR, PTAFR                                                                                                                                    | 2.70731221 | 0.01912387 | 0.00030645 | 0.01314537 |
| GO:0001819~positive regulation of cytokine production   | 13 | 1.57575758 | 7.7918E-06 | ADORA2B, H2-M3, IL18, H2-Q1, KLRK1, CD40, CX3CL1, H2-Q6, H2-Q7, TIGIT, SLC11A1, NOD2, IFNG, PYCARD, BCL3                                                                                                                                                                                                                   | 5.02486204 | 0.02007778 | 0.00031686 | 0.01380772 |
| GO:0019220~regulation of phosphate metabolic process    | 31 | 3.75757576 | 8.8249E-06 | CAV1, ADORA2A, EFNA1, CSF1, EDN1, TLR1, CSPG4, KIT, CD24A, APLP2, CD74, PRKAR2B, SLC11A1, SPRY1, NOD2, IFNG, CD4, NRG1, FAM129A, CEACAM1, PPP1R14A, BMP2, SOCS3, SOCS1, TNFRSF14, IL22, THY1, CARD10, CDKN1C, FABP4, JAK2                                                                                                  | 2.46812799 | 0.02270947 | 0.00035334 | 0.01563835 |

|                                                                           |    |            |            |                                                                                                                                                                                                                                                                                                                         |            |            |            |            |
|---------------------------------------------------------------------------|----|------------|------------|-------------------------------------------------------------------------------------------------------------------------------------------------------------------------------------------------------------------------------------------------------------------------------------------------------------------------|------------|------------|------------|------------|
| GO:0051174~regulation of phosphorus metabolic process                     | 31 | 3.75757576 | 8.8249E-06 | CAV1, ADORA2A, EFNA1, CSF1, EDN1, TLR1, CSPG4, KIT, CD24A, APLP2, CD74, PRKAR2B, SLC11A1, SPRY1, NOD2, IFNG, CD4, NRG1, FAM129A, CEACAM1, PPP1R14A, BMP2, SOCS3, SOCS1, TNFRSF14, IL22, THY1, CARD10, CDKN1C, FABP4, JAK2                                                                                               | 2.46812799 | 0.02270947 | 0.00035334 | 0.01563835 |
| GO:0002455~humoral immune response mediated by circulating immunoglobulin | 10 | 1.21212121 | 9.4685E-06 | IGHG1, C1QB, C1RA, C3, C4B, CFB, C1RL, BCL3, C1S, C1QC                                                                                                                                                                                                                                                                  | 6.84706475 | 0.02434525 | 0.00037336 | 0.01677869 |
| GO:0001775~cell activation                                                | 27 | 3.27272727 | 1.2495E-05 | CSF2, CD8A, ADORA2A, TLR1, KLRK1, SOX4, PF4, CD1D1, CD24A, ADA, CD74, HSH2D, CD1D2, TIMP1, SLC11A1, BCL11B, BCL3, CD4, LTA, SATB1, H2-M3, SLA2, CD40, VWF, FCGR2B, LAX1, LCK, IRF1                                                                                                                                      | 2.63027487 | 0.03200116 | 0.00048532 | 0.02214116 |
| GO:0070482~response to oxygen levels                                      | 13 | 1.57575758 | 1.2963E-05 | CAV1, EPAS1, IL18, EDN1, PML, MMP14, CD24A, TRF, SOD2, ACE, HIF1A, UCP3, NOS2                                                                                                                                                                                                                                           | 4.79294533 | 0.03318032 | 0.0004961  | 0.02297083 |
| GO:0002683~negative regulation of immune system process                   | 14 | 1.6969697  | 1.3546E-05 | IL2RA, ADORA2A, TNFRSF14, CD24A, ADA, CD74, PDCD1LG2, THY1, TIGIT, GM8810, NOD2, FCGR2B, H2-BL, CD274, LAG3                                                                                                                                                                                                             | 4.41455491 | 0.03464661 | 0.0005109  | 0.02400393 |
| GO:0010033~response to organic substance                                  | 43 | 5.21212121 | 1.5147E-05 | CAV1, ART2B, ADORA2A, LEPR, PPARG, TLR1, SERPINA3F, CCL5, CD24A, TRF, SRC, ACSBG1, B2M, SLC11A1, NOD2, TAP2, IFNG, CD4, DDAH2, IRG1, EGR2, CYP2D2, H2-M3, GATM, PFKL, CYP11A1, CFB, SELL, MMP14, STAT1, LPIN1, VASH1, SERPINA3N, THBD, SERPINA3H, SERPINA3G, SERPINA3I, CASP12, FABP4, JAK2, ID3, EIF2AK2, HTR2C, PTAFR | 2.04056088 | 0.038661   | 0.0005631  | 0.02684032 |
| GO:0019955~cytokine binding                                               | 15 | 1.81818182 | 1.5205E-05 | IL2RB, IL2RA, IL18RAP, LEPR, IL21R, CXCR1, CXCR3, CD74, IL12RB1, IL18BP, CCR5, CCR2, IL12A, EPOR, IL2RG                                                                                                                                                                                                                 | 4.08108108 | 0.01102366 | 0.00276738 | 0.02305288 |
| GO:0031349~positive regulation of defense response                        | 12 | 1.45454545 | 1.9169E-05 | IGHG1, NOD2, SH2D1A, ADORA2B, H2-M3, C3, KLRK1, TGM2, FABP4, CD24A, FCGR1, LAG3                                                                                                                                                                                                                                         | 5.04520561 | 0.04867186 | 0.00070252 | 0.03396513 |
| GO:0050727~regulation of inflammatory response                            | 12 | 1.45454545 | 1.9169E-05 | IGHG1, IL2RA, ADORA2B, FCGR2B, C3, ADORA2A, AOA, TGM2, FABP4, CD24A, FCGR1, ADA                                                                                                                                                                                                                                         | 5.04520561 | 0.04867186 | 0.00070252 | 0.03396513 |
| GO:0006958~complement activation, classical pathway                       | 9  | 1.09090909 | 2.2392E-05 | IGHG1, C1QB, C1RA, C3, C4B, CFB, C1RL, C1S, C1QC                                                                                                                                                                                                                                                                        | 7.18941799 | 0.05662201 | 0.00080923 | 0.03967656 |
| GO:0002237~response to molecule of bacterial origin                       | 11 | 1.33333333 | 2.7479E-05 | SLC11A1, NOD2, THBD, H2-M3, TAP2, TLR1, STAT1, CD24A, IRG1, PTAFR, B2M                                                                                                                                                                                                                                                  | 5.37983659 | 0.0690306  | 0.00097937 | 0.04868722 |
| GO:0002526~acute inflammatory response                                    | 14 | 1.6969697  | 2.7516E-05 | IGHG1, CFB, C4B, C3, SAA3, C1S, C1QC, FCGR1, TRF, ORM1, C1RA, C1QB, SERPINA3N, C1RL                                                                                                                                                                                                                                     | 4.14205152 | 0.06912056 | 0.00096744 | 0.04875298 |
