# Supplementary material for: IFN-γ immune priming of macrophages in vivo induces prolonged STAT1 binding and protection against Cryptococcus neoformans
Source: PubMed Central journal article supplement (PMC6197699; doi:10.1371/journal.ppat.1007358), 2018-10-10
Supplement: ppat.1007358.s005.pdf [file ppat.1007358.s005.pdf]

### Supplementary Table 3: Antibodies

#### Flow Cytometry

| Marker                     | Clone     | Source          | Catalog #             |
|----------------------------|-----------|-----------------|-----------------------|
| 1A8 (Ly-6G)-APC            | 1A8       | BD Biosciences  | 560599                |
| Gr1 (Ly6G/Ly6c)-PE         | RB6-8C5   | BD Biosciences  | 553128                |
| CD335 (NKp46)-eFluor 660   | 29A1.4    | eBiosciences    | 50-3351-80            |
| CD3e-PE-Cy7                | 145-2C11  | eBiosciences    | 25-0031-81            |
| CD3-PE-Cy7                 | 145-2C11  | BD Biosciences  | T cell Mix,<br>558431 |
| CD4-PE                     | RM4-5     | BD Biosciences  |                       |
| CD8a-APC                   | 53-6.7    | BD Biosciences  |                       |
| F4/80-PE                   | BM8       | eBiosciences    | 12-4801-80            |
| F4/80-Biotin               | BM8       | eBiosciences    | 13-4801-82            |
| CD11b-PE                   | M1/70     | Biolegend       | 101224                |
| CD64-PE-Cy7                | X54-5/7.1 | Biolegend       | 139317                |
| TNF- $\alpha$ -PE          | MP6-XT22  | eBiosciences    | 12-7321-81            |
| IFN- $\gamma$ -APC         | XMG1.2    | eBiosciences    | 17-7311-81            |
| IL-2-PE                    | JES6-5H4  | BD Biosciences  | 561061                |
| Labeling Check Reagent-APC | n/a       | Miltenyi Biotec | 130-095-237           |

#### Western Blot

| Marker                       | Clone      | Source         | Catalog # |
|------------------------------|------------|----------------|-----------|
| STAT1                        | polyclonal | Cell Signaling | 9172      |
| STAT1-phosphorylated Tyr701  | 58D6       | Cell Signaling | 9167      |
| Torin                        | 7C10       | Cell Signaling | 2983      |
| Torin-phosphorylated Ser2448 | D9C2       | Cell Signaling | 5536      |
| $\beta$ -actin               | 13E5       | Cell Signaling | 4970      |
